# Supplementary material for: Characterization of the mutational landscape of high-grade gliomas in a Latin American cohort
Source: bioRxiv or medRxiv preprint supplement (doi:10.1101/2023.12.05.23299374), 2023-12-05
Supplement: Supplementary file [file media-1.pdf]

# Supplementary Figure 1

NCBI Multiple Sequence Alignment Viewer, Version 1.25.0

| Sequence ID        | Alignment                                                                                                                        | Organism                  |
|--------------------|----------------------------------------------------------------------------------------------------------------------------------|---------------------------|
|                    | 892                      900                      910                      920                      930                      936 |                           |
| NP_001424.3 (+)    | Y K G G S V R D L L R A M R N K K H H Y R E L P A E V R E T L G S L P D D F V C Y F T S R                                        | Homo sapiens              |
| NP_076402.1 (+)    | Y K G G S V R D L L R A M R N K K H H Y R E L P V E V Q E T L G S I P D D F V R Y F T S R                                        | Mus musculus              |
| NP_001178855.1 (+) | Y K G G S V R D L L R A M R N K R H H Y R E L P L E V Q E T L G S I P D D F V R Y F T S R                                        | Rattus norvegicus         |
| NP_011946.1 (+)    | Y H S S K L M D L L R A L R N K Y H H F M D L P E D I A E L M G P V P D G F Y D Y F T K R                                        | Saccharomyces cerevisi... |

NCBI Multiple Sequence Alignment Viewer, Version 1.25.0

| Sequence ID        | Alignment                                                                                                                        | Organism                  |
|--------------------|----------------------------------------------------------------------------------------------------------------------------------|---------------------------|
|                    | 892                      900                      910                      920                      930                      936 |                           |
| NP_001424.3 (+)    | Y K G G S V R D L L R A M R N K K H H Y R E L P A E V R E T L G S L P D D F V C Y F T S R                                        | Homo sapiens              |
| NP_076402.1 (+)    | Y K G G S V R D L L R A M R N K K H H Y R E L P V E V Q E T L G S I P D D F V R Y F T S R                                        | Mus musculus              |
| NP_001178855.1 (+) | Y K G G S V R D L L R A M R N K R H H Y R E L P L E V Q E T L G S I P D D F V R Y F T S R                                        | Rattus norvegicus         |
| NP_011946.1 (+)    | Y H S S K L M D L L R A L R N K Y H H F M D L P E D I A E L M G P V P D G F Y D Y F T K R                                        | Saccharomyces cerevisi... |

Supplementary Table 11

| Ampliseq primers |            |          |                  |                |
|------------------|------------|----------|------------------|----------------|
| AmpliconId       | Chromosome | Gene     | Start_Coordinate | End_Coordinate |
| AMPL656428       | chr1       | H3F3A    | 226064194        | 226064278      |
| AMPL656470       | chr1       | H3F3A    | 226064481        | 226064549      |
| AMPL656451       | chr2       | IDH1     | 208248213        | 208248285      |
| AMPL656452       | chr2       | IDH1     | 208248274        | 208248341      |
| AMPL656453       | chr2       | IDH1     | 208248326        | 208248406      |
| AMPL368995       | chr2       | IDH1     | 208248397        | 208248485      |
| AMPL368171       | chr2       | IDH1     | 208248484        | 208248563      |
| AMPL368172       | chr2       | IDH1     | 208248552        | 208248631      |
| AMPL368173       | chr2       | IDH1     | 208248603        | 208248677      |
| AMPL380375       | chr5       | TERT     | 1294941          | 1295036        |
| AMPL499877       | chr6       | HIST1H3B | 26031625         | 26031713       |
| AMPL499878       | chr6       | HIST1H3B | 26031704         | 26031795       |
| AMPL499879       | chr6       | HIST1H3B | 26031773         | 26031863       |
| AMPL499880       | chr6       | HIST1H3B | 26031843         | 26031934       |
| AMPL499881       | chr6       | HIST1H3B | 26031923         | 26032022       |
| AMPL499882       | chr6       | HIST1H3B | 26031954         | 26032047       |
| AMPL499883       | chr6       | HIST1H3B | 26032047         | 26032122       |
| AMPL658497       | chr7       | EGFR     | 55019238         | 55019338       |
| AMPL30339        | chr7       | EGFR     | 55019255         | 55019353       |
| AMPL30340        | chr7       | EGFR     | 55019380         | 55019473       |
| AMPL865449       | chr7       | EGFR     | 55019383         | 55019487       |
| AMPL656522       | chr7       | EGFR     | 55142185         | 55142259       |
| AMPL656523       | chr7       | EGFR     | 55142237         | 55142317       |
| AMPL30327        | chr7       | EGFR     | 55142308         | 55142391       |
| AMPL30328        | chr7       | EGFR     | 55142383         | 55142466       |
| AMPL656532       | chr7       | EGFR     | 55142455         | 55142523       |
| AMPL865444       | chr7       | EGFR     | 55143248         | 55143344       |
| AMPL656508       | chr7       | EGFR     | 55143337         | 55143413       |
| AMPL656509       | chr7       | EGFR     | 55143402         | 55143476       |
| AMPL656510       | chr7       | EGFR     | 55143465         | 55143555       |
| AMPL30329        | chr7       | EGFR     | 55146535         | 55146627       |
| AMPL31746        | chr7       | EGFR     | 55146616         | 55146712       |
| AMPL658500       | chr7       | EGFR     | 55146701         | 55146784       |
| AMPL656496       | chr7       | EGFR     | 55146773         | 55146844       |
| AMPL656542       | chr7       | EGFR     | 55151182         | 55151267       |
| AMPL656543       | chr7       | EGFR     | 55151256         | 55151344       |
| AMPL30293        | chr7       | EGFR     | 55151323         | 55151402       |
| AMPL865441       | chr7       | EGFR     | 55152458         | 55152551       |
| AMPL865442       | chr7       | EGFR     | 55152551         | 55152647       |
| AMPL31744        | chr7       | EGFR     | 55152632         | 55152718       |
| AMPL658503       | chr7       | EGFR     | 55152673         | 55152751       |
| AMPL30302        | chr7       | EGFR     | 55153932         | 55154020       |
| AMPL30303        | chr7       | EGFR     | 55154009         | 55154106       |

|            |      |      |          |          |
|------------|------|------|----------|----------|
| AMPL30304  | chr7 | EGFR | 55154078 | 55154171 |
| AMPL30305  | chr7 | EGFR | 55154127 | 55154221 |
| AMPL656497 | chr7 | EGFR | 55155624 | 55155717 |
| AMPL656498 | chr7 | EGFR | 55155708 | 55155796 |
| AMPL30296  | chr7 | EGFR | 55155738 | 55155828 |
| AMPL30297  | chr7 | EGFR | 55155817 | 55155915 |
| AMPL30298  | chr7 | EGFR | 55155904 | 55156000 |
| AMPL656539 | chr7 | EGFR | 55156406 | 55156494 |
| AMPL540285 | chr7 | EGFR | 55156483 | 55156558 |
| AMPL656540 | chr7 | EGFR | 55156527 | 55156602 |
| AMPL865437 | chr7 | EGFR | 55156591 | 55156664 |
| AMPL865438 | chr7 | EGFR | 55156624 | 55156711 |
| AMPL865439 | chr7 | EGFR | 55156697 | 55156782 |
| AMPL865440 | chr7 | EGFR | 55156774 | 55156859 |
| AMPL656518 | chr7 | EGFR | 55156848 | 55156927 |
| AMPL30261  | chr7 | EGFR | 55157590 | 55157662 |
| AMPL30262  | chr7 | EGFR | 55157651 | 55157742 |
| AMPL30263  | chr7 | EGFR | 55157731 | 55157803 |
| AMPL30277  | chr7 | EGFR | 55160054 | 55160143 |
| AMPL30278  | chr7 | EGFR | 55160132 | 55160207 |
| AMPL30279  | chr7 | EGFR | 55160194 | 55160272 |
| AMPL30280  | chr7 | EGFR | 55160240 | 55160327 |
| AMPL30281  | chr7 | EGFR | 55160317 | 55160400 |
| AMPL31736  | chr7 | EGFR | 55161412 | 55161509 |
| AMPL31737  | chr7 | EGFR | 55161498 | 55161599 |
| AMPL31738  | chr7 | EGFR | 55161588 | 55161665 |
| AMPL656476 | chr7 | EGFR | 55161628 | 55161713 |
| AMPL30275  | chr7 | EGFR | 55163679 | 55163765 |
| AMPL47950  | chr7 | EGFR | 55163751 | 55163834 |
| AMPL656483 | chr7 | EGFR | 55163774 | 55163868 |
| AMPL30334  | chr7 | EGFR | 55165208 | 55165283 |
| AMPL30335  | chr7 | EGFR | 55165272 | 55165350 |
| AMPL30336  | chr7 | EGFR | 55165316 | 55165400 |
| AMPL656502 | chr7 | EGFR | 55165387 | 55165463 |
| AMPL656503 | chr7 | EGFR | 55165453 | 55165537 |
| AMPL656484 | chr7 | EGFR | 55168356 | 55168424 |
| AMPL656485 | chr7 | EGFR | 55168410 | 55168475 |
| AMPL656486 | chr7 | EGFR | 55168441 | 55168519 |
| AMPL30246  | chr7 | EGFR | 55168508 | 55168569 |
| AMPL656515 | chr7 | EGFR | 55170142 | 55170226 |
| AMPL656516 | chr7 | EGFR | 55170206 | 55170294 |
| AMPL30265  | chr7 | EGFR | 55170283 | 55170369 |
| AMPL30266  | chr7 | EGFR | 55170358 | 55170446 |
| AMPL30267  | chr7 | EGFR | 55170444 | 55170540 |
| AMPL406048 | chr7 | EGFR | 55170529 | 55170626 |

|            |      |      |          |          |
|------------|------|------|----------|----------|
| AMPL406049 | chr7 | EGFR | 55170626 | 55170720 |
| AMPL406054 | chr7 | EGFR | 55171037 | 55171108 |
| AMPL656491 | chr7 | EGFR | 55171046 | 55171118 |
| AMPL30247  | chr7 | EGFR | 55171142 | 55171222 |
| AMPL656489 | chr7 | EGFR | 55171211 | 55171304 |
| AMPL30299  | chr7 | EGFR | 55172894 | 55172986 |
| AMPL31745  | chr7 | EGFR | 55172983 | 55173083 |
| AMPL30301  | chr7 | EGFR | 55173097 | 55173194 |
| AMPL30269  | chr7 | EGFR | 55173869 | 55173961 |
| AMPL30270  | chr7 | EGFR | 55173950 | 55174031 |
| AMPL30271  | chr7 | EGFR | 55174018 | 55174106 |
| AMPL656519 | chr7 | EGFR | 55174060 | 55174143 |
| AMPL656536 | chr7 | EGFR | 55174592 | 55174673 |
| AMPL656537 | chr7 | EGFR | 55174659 | 55174735 |
| AMPL656538 | chr7 | EGFR | 55174724 | 55174800 |
| AMPL865433 | chr7 | EGFR | 55174789 | 55174871 |
| AMPL656488 | chr7 | EGFR | 55174866 | 55174946 |
| AMPL31739  | chr7 | EGFR | 55181203 | 55181293 |
| AMPL31740  | chr7 | EGFR | 55181281 | 55181371 |
| AMPL31741  | chr7 | EGFR | 55181365 | 55181451 |
| AMPL658498 | chr7 | EGFR | 55181440 | 55181522 |
| AMPL656471 | chr7 | EGFR | 55191589 | 55191679 |
| AMPL30322  | chr7 | EGFR | 55191675 | 55191769 |
| AMPL30323  | chr7 | EGFR | 55191715 | 55191799 |
| AMPL30324  | chr7 | EGFR | 55191788 | 55191869 |
| AMPL30325  | chr7 | EGFR | 55191858 | 55191935 |
| AMPL30289  | chr7 | EGFR | 55192713 | 55192792 |
| AMPL30290  | chr7 | EGFR | 55192778 | 55192854 |
| AMPL30291  | chr7 | EGFR | 55192833 | 55192915 |
| AMPL656533 | chr7 | EGFR | 55198570 | 55198649 |
| AMPL30318  | chr7 | EGFR | 55198638 | 55198724 |
| AMPL30319  | chr7 | EGFR | 55198702 | 55198779 |
| AMPL30320  | chr7 | EGFR | 55198768 | 55198856 |
| AMPL30321  | chr7 | EGFR | 55198845 | 55198936 |
| AMPL656480 | chr7 | EGFR | 55200178 | 55200267 |
| AMPL47948  | chr7 | EGFR | 55200256 | 55200347 |
| AMPL865432 | chr7 | EGFR | 55200337 | 55200432 |
| AMPL30274  | chr7 | EGFR | 55200425 | 55200513 |
| AMPL656493 | chr7 | EGFR | 55201089 | 55201156 |
| AMPL656494 | chr7 | EGFR | 55201145 | 55201225 |
| AMPL656495 | chr7 | EGFR | 55201187 | 55201271 |
| AMPL47943  | chr7 | EGFR | 55201260 | 55201349 |
| AMPL47944  | chr7 | EGFR | 55201294 | 55201375 |
| AMPL656487 | chr7 | EGFR | 55201364 | 55201434 |
| AMPL656528 | chr7 | EGFR | 55201654 | 55201732 |

|            |      |        |           |           |
|------------|------|--------|-----------|-----------|
| AMPL656529 | chr7 | EGFR   | 55201713  | 55201786  |
| AMPL30256  | chr7 | EGFR   | 55201774  | 55201845  |
| AMPL656513 | chr7 | EGFR   | 55201808  | 55201879  |
| AMPL656514 | chr7 | EGFR   | 55201879  | 55201949  |
| AMPL30252  | chr7 | EGFR   | 55202452  | 55202545  |
| AMPL30253  | chr7 | EGFR   | 55202535  | 55202633  |
| AMPL30254  | chr7 | EGFR   | 55202559  | 55202657  |
| AMPL656506 | chr7 | EGFR   | 55205158  | 55205240  |
| AMPL656507 | chr7 | EGFR   | 55205229  | 55205312  |
| AMPL30307  | chr7 | EGFR   | 55205312  | 55205394  |
| AMPL30308  | chr7 | EGFR   | 55205331  | 55205420  |
| AMPL30309  | chr7 | EGFR   | 55205412  | 55205493  |
| AMPL30310  | chr7 | EGFR   | 55205437  | 55205526  |
| AMPL30311  | chr7 | EGFR   | 55205515  | 55205590  |
| AMPL30312  | chr7 | EGFR   | 55205575  | 55205653  |
| AMPL656455 | chr7 | BRAF   | 140753110 | 140753187 |
| AMPL865434 | chr7 | BRAF   | 140753200 | 140753280 |
| AMPL402786 | chr7 | BRAF   | 140753275 | 140753352 |
| AMPL385965 | chr7 | BRAF   | 140753341 | 140753415 |
| AMPL473617 | chr7 | BRAF   | 140753377 | 140753443 |
| AMPL473618 | chr7 | BRAF   | 140753437 | 140753509 |
| AMPL656436 | chr7 | BRAF   | 140753477 | 140753549 |
| AMPL656437 | chr7 | BRAF   | 140753542 | 140753609 |
| AMPL656441 | chr7 | BRAF   | 140781560 | 140781643 |
| AMPL656442 | chr7 | BRAF   | 140781595 | 140781676 |
| AMPL30217  | chr7 | BRAF   | 140781668 | 140781736 |
| AMPL399513 | chr9 | CDKN2A | 21968113  | 21968200  |
| AMPL865435 | chr9 | CDKN2A | 21968189  | 21968274  |
| AMPL865436 | chr9 | CDKN2A | 21968263  | 21968337  |
| AMPL865450 | chr9 | CDKN2A | 21968648  | 21968746  |
| AMPL362492 | chr9 | CDKN2A | 21968743  | 21968826  |
| AMPL398554 | chr9 | CDKN2A | 21970840  | 21970931  |
| AMPL865446 | chr9 | CDKN2A | 21970896  | 21970977  |
| AMPL865447 | chr9 | CDKN2A | 21971236  | 21971328  |
| AMPL48429  | chr9 | CDKN2A | 21974428  | 21974512  |
| AMPL48430  | chr9 | CDKN2A | 21974492  | 21974574  |
| AMPL48431  | chr9 | CDKN2A | 21974533  | 21974616  |
| AMPL48432  | chr9 | CDKN2A | 21974605  | 21974695  |
| AMPL48433  | chr9 | CDKN2A | 21974684  | 21974785  |
| AMPL865431 | chr9 | CDKN2A | 21974938  | 21975026  |
| AMPL48437  | chr9 | CDKN2A | 21994069  | 21994166  |
| AMPL48438  | chr9 | CDKN2A | 21994155  | 21994248  |
| AMPL48439  | chr9 | CDKN2A | 21994199  | 21994296  |
| AMPL48440  | chr9 | CDKN2A | 21994280  | 21994375  |
| AMPL865443 | chr9 | CDKN2A | 21994319  | 21994412  |

|            |       |      |          |          |
|------------|-------|------|----------|----------|
| AMPL30705  | chr10 | PTEN | 87864406 | 87864493 |
| AMPL48109  | chr10 | PTEN | 87864483 | 87864564 |
| AMPL656432 | chr10 | PTEN | 87864553 | 87864625 |
| AMPL593000 | chr10 | PTEN | 87893903 | 87893979 |
| AMPL30723  | chr10 | PTEN | 87894007 | 87894081 |
| AMPL30724  | chr10 | PTEN | 87894076 | 87894158 |
| AMPL656427 | chr10 | PTEN | 87894130 | 87894202 |
| AMPL592997 | chr10 | PTEN | 87925429 | 87925496 |
| AMPL30716  | chr10 | PTEN | 87925485 | 87925554 |
| AMPL30717  | chr10 | PTEN | 87925533 | 87925607 |
| AMPL656460 | chr10 | PTEN | 87925588 | 87925659 |
| AMPL656461 | chr10 | PTEN | 87930951 | 87931029 |
| AMPL656462 | chr10 | PTEN | 87930986 | 87931063 |
| AMPL30704  | chr10 | PTEN | 87931052 | 87931121 |
| AMPL592999 | chr10 | PTEN | 87931092 | 87931164 |
| AMPL656426 | chr10 | PTEN | 87931153 | 87931230 |
| AMPL656429 | chr10 | PTEN | 87932916 | 87932986 |
| AMPL865448 | chr10 | PTEN | 87932960 | 87933037 |
| AMPL30695  | chr10 | PTEN | 87933026 | 87933112 |
| AMPL30696  | chr10 | PTEN | 87933102 | 87933194 |
| AMPL30697  | chr10 | PTEN | 87933185 | 87933265 |
| AMPL30698  | chr10 | PTEN | 87933255 | 87933332 |
| AMPL656447 | chr10 | PTEN | 87951939 | 87952026 |
| AMPL656448 | chr10 | PTEN | 87952036 | 87952105 |
| AMPL656449 | chr10 | PTEN | 87952066 | 87952134 |
| AMPL30713  | chr10 | PTEN | 87952123 | 87952200 |
| AMPL30714  | chr10 | PTEN | 87952189 | 87952271 |
| AMPL30715  | chr10 | PTEN | 87952270 | 87952346 |
| AMPL592998 | chr10 | PTEN | 87957757 | 87957847 |
| AMPL48104  | chr10 | PTEN | 87957837 | 87957919 |
| AMPL48105  | chr10 | PTEN | 87957856 | 87957936 |
| AMPL30720  | chr10 | PTEN | 87957935 | 87958015 |
| AMPL30721  | chr10 | PTEN | 87957958 | 87958042 |
| AMPL30722  | chr10 | PTEN | 87958042 | 87958106 |
| AMPL656439 | chr10 | PTEN | 87960716 | 87960790 |
| AMPL656440 | chr10 | PTEN | 87960807 | 87960886 |
| AMPL30689  | chr10 | PTEN | 87960822 | 87960894 |
| AMPL30690  | chr10 | PTEN | 87960915 | 87960991 |
| AMPL30691  | chr10 | PTEN | 87960981 | 87961056 |
| AMPL30692  | chr10 | PTEN | 87961045 | 87961111 |
| AMPL656458 | chr10 | PTEN | 87965155 | 87965232 |
| AMPL30707  | chr10 | PTEN | 87965193 | 87965270 |
| AMPL30708  | chr10 | PTEN | 87965265 | 87965342 |
| AMPL30709  | chr10 | PTEN | 87965331 | 87965420 |
| AMPL30710  | chr10 | PTEN | 87965409 | 87965478 |

|            |       |      |          |          |
|------------|-------|------|----------|----------|
| AMPL30711  | chr10 | PTEN | 87965467 | 87965542 |
| AMPL656423 | chr15 | IDH2 | 90088424 | 90088511 |
| AMPL373004 | chr15 | IDH2 | 90088509 | 90088609 |
| AMPL370993 | chr15 | IDH2 | 90088524 | 90088622 |
| AMPL370994 | chr15 | IDH2 | 90088619 | 90088702 |
| AMPL370997 | chr15 | IDH2 | 90088668 | 90088742 |
| AMPL141289 | chr17 | TP53 | 7669493  | 7669587  |
| AMPL141290 | chr17 | TP53 | 7669549  | 7669623  |
| AMPL141291 | chr17 | TP53 | 7669612  | 7669690  |
| AMPL141292 | chr17 | TP53 | 7669679  | 7669760  |
| AMPL405259 | chr17 | TP53 | 7670502  | 7670594  |
| AMPL46528  | chr17 | TP53 | 7670569  | 7670665  |
| AMPL46529  | chr17 | TP53 | 7670664  | 7670748  |
| AMPL46539  | chr17 | TP53 | 7673176  | 7673251  |
| AMPL656463 | chr17 | TP53 | 7673240  | 7673319  |
| AMPL656464 | chr17 | TP53 | 7673308  | 7673397  |
| AMPL405256 | chr17 | TP53 | 7673464  | 7673540  |
| AMPL405257 | chr17 | TP53 | 7673520  | 7673609  |
| AMPL405258 | chr17 | TP53 | 7673601  | 7673689  |
| AMPL405261 | chr17 | TP53 | 7673660  | 7673741  |
| AMPL46533  | chr17 | TP53 | 7673713  | 7673808  |
| AMPL405262 | chr17 | TP53 | 7673770  | 7673850  |
| AMPL405263 | chr17 | TP53 | 7673839  | 7673933  |
| AMPL656465 | chr17 | TP53 | 7673970  | 7674064  |
| AMPL865445 | chr17 | TP53 | 7674073  | 7674160  |
| AMPL46530  | chr17 | TP53 | 7674137  | 7674229  |
| AMPL368771 | chr17 | TP53 | 7674217  | 7674312  |
| AMPL405266 | chr17 | TP53 | 7674777  | 7674870  |
| AMPL46546  | chr17 | TP53 | 7674824  | 7674901  |
| AMPL140965 | chr17 | TP53 | 7674890  | 7674969  |
| AMPL140966 | chr17 | TP53 | 7674958  | 7675048  |
| AMPL46543  | chr17 | TP53 | 7674997  | 7675091  |
| AMPL60     | chr17 | TP53 | 7675068  | 7675160  |
| AMPL46544  | chr17 | TP53 | 7675128  | 7675207  |
| AMPL656469 | chr17 | TP53 | 7675182  | 7675268  |
| AMPL140961 | chr17 | TP53 | 7675902  | 7675997  |
| AMPL140962 | chr17 | TP53 | 7675975  | 7676067  |
| AMPL46536  | chr17 | TP53 | 7676067  | 7676165  |
| AMPL46537  | chr17 | TP53 | 7676090  | 7676185  |
| AMPL46538  | chr17 | TP53 | 7676184  | 7676277  |
| AMPL140964 | chr17 | TP53 | 7676267  | 7676363  |
| AMPL46548  | chr17 | TP53 | 7676300  | 7676390  |
| AMPL46549  | chr17 | TP53 | 7676397  | 7676492  |
| AMPL381025 | chr17 | TP53 | 7676464  | 7676563  |
| AMPL381026 | chr17 | TP53 | 7676552  | 7676642  |

|            |       |      |          |          |
|------------|-------|------|----------|----------|
| AMPL866642 | chr17 | NF1  | 31156039 | 31156128 |
| AMPL47393  | chr17 | NF1  | 31169973 | 31170035 |
| AMPL47431  | chr17 | NF1  | 31181446 | 31181525 |
| AMPL866636 | chr17 | NF1  | 31182534 | 31182620 |
| AMPL47323  | chr17 | NF1  | 31206264 | 31206354 |
| AMPL866634 | chr17 | NF1  | 31206308 | 31206392 |
| AMPL368806 | chr17 | NF1  | 31226377 | 31226467 |
| AMPL47344  | chr17 | NF1  | 31226662 | 31226743 |
| AMPL866639 | chr17 | NF1  | 31227238 | 31227330 |
| AMPL47349  | chr17 | NF1  | 31229006 | 31229087 |
| AMPL47379  | chr17 | NF1  | 31229771 | 31229851 |
| AMPL76909  | chr17 | NF1  | 31230320 | 31230395 |
| AMPL866641 | chr17 | NF1  | 31232763 | 31232849 |
| AMPL866648 | chr17 | NF1  | 31235599 | 31235684 |
| AMPL866645 | chr17 | NF1  | 31261658 | 31261745 |
| AMPL866640 | chr17 | NF1  | 31327707 | 31327791 |
| AMPL866643 | chr17 | NF1  | 31327804 | 31327893 |
| AMPL866644 | chr17 | NF1  | 31334880 | 31334965 |
| AMPL47434  | chr17 | NF1  | 31334975 | 31335058 |
| AMPL866638 | chr17 | NF1  | 31338030 | 31338110 |
| AMPL47385  | chr17 | NF1  | 31338728 | 31338813 |
| AMPL866637 | chr17 | NF1  | 31340572 | 31340656 |
| AMPL866633 | chr17 | NF1  | 31350182 | 31350270 |
| AMPL866647 | chr17 | NF1  | 31356487 | 31356554 |
| AMPL593577 | chr17 | NF1  | 31357282 | 31357356 |
| AMPL866574 | chrX  | ATRX | 77523207 | 77523290 |
| AMPL866564 | chrX  | ATRX | 77523296 | 77523377 |
| AMPL866568 | chrX  | ATRX | 77557541 | 77557616 |
| AMPL79778  | chrX  | ATRX | 77558690 | 77558758 |
| AMPL372328 | chrX  | ATRX | 77574281 | 77574352 |
| AMPL866550 | chrX  | ATRX | 77593734 | 77593819 |
| AMPL866552 | chrX  | ATRX | 77599423 | 77599510 |
| AMPL866549 | chrX  | ATRX | 77599532 | 77599610 |
| AMPL866573 | chrX  | ATRX | 77600466 | 77600541 |
| AMPL866556 | chrX  | ATRX | 77616615 | 77616684 |
| AMPL372321 | chrX  | ATRX | 77618827 | 77618913 |
| AMPL866535 | chrX  | ATRX | 77620419 | 77620491 |
| AMPL866533 | chrX  | ATRX | 77633193 | 77633267 |
| AMPL866529 | chrX  | ATRX | 77634595 | 77634679 |
| AMPL866546 | chrX  | ATRX | 77635973 | 77636052 |
| AMPL79791  | chrX  | ATRX | 77652092 | 77652170 |
| AMPL866570 | chrX  | ATRX | 77654099 | 77654178 |
| AMPL866532 | chrX  | ATRX | 77656524 | 77656609 |
| AMPL866554 | chrX  | ATRX | 77656620 | 77656701 |
| AMPL372325 | chrX  | ATRX | 77663426 | 77663508 |



|            |      |      |          |          |
|------------|------|------|----------|----------|
| AMPL866548 | chrX | ATRX | 77663505 | 77663589 |
| AMPL866566 | chrX | ATRX | 77664666 | 77664749 |
| AMPL866547 | chrX | ATRX | 77681702 | 77681789 |
| AMPL866538 | chrX | ATRX | 77681896 | 77681967 |
| AMPL866562 | chrX | ATRX | 77682075 | 77682160 |
| AMPL866553 | chrX | ATRX | 77682241 | 77682328 |
| AMPL866542 | chrX | ATRX | 77682385 | 77682475 |
| AMPL866559 | chrX | ATRX | 77682488 | 77682580 |
| AMPL866537 | chrX | ATRX | 77682557 | 77682640 |
| AMPL866563 | chrX | ATRX | 77682713 | 77682798 |
| AMPL866571 | chrX | ATRX | 77682785 | 77682869 |
| AMPL866557 | chrX | ATRX | 77682873 | 77682949 |
| AMPL866544 | chrX | ATRX | 77683025 | 77683092 |
| AMPL866551 | chrX | ATRX | 77683222 | 77683295 |
| AMPL372258 | chrX | ATRX | 77683563 | 77683633 |
| AMPL866531 | chrX | ATRX | 77683606 | 77683692 |
| AMPL866545 | chrX | ATRX | 77683797 | 77683880 |
| AMPL866543 | chrX | ATRX | 77683900 | 77683966 |
| AMPL866561 | chrX | ATRX | 77684063 | 77684152 |
| AMPL372267 | chrX | ATRX | 77684133 | 77684220 |
| AMPL866555 | chrX | ATRX | 77684263 | 77684347 |
| AMPL866540 | chrX | ATRX | 77684326 | 77684414 |
| AMPL866575 | chrX | ATRX | 77684424 | 77684511 |
| AMPL866567 | chrX | ATRX | 77684537 | 77684622 |
| AMPL372352 | chrX | ATRX | 77684913 | 77684999 |

**Truseq amplicons**

| AmpliconId       | Chromosome | Gene     | Start_Coordinate | End_Coordinate |
|------------------|------------|----------|------------------|----------------|
| hH3F3A           | chr1       | H3F3A    | 226064379        | 226064572      |
| hIDH1            | chr2       | IDH1     | 208248354        | 208248575      |
| hSMARCAL1-645    | chr2       | SMARCAL1 | 216450877        | 216451079      |
| hSMARCAL1-793    | chr2       | SMARCAL1 | 216475279        | 216475481      |
| hSMARCAL1-_945   | chr2       | SMARCAL1 | 216482872        | 216483106      |
| hTERT_Set_2      | chr5       | TERT     | 1295037          | 1295278        |
| hCDKN2A_Ex_3A    | chr9       | CDKN2A   | 21967691         | 21967941       |
| hCDKN2A_Ex_3B    | chr9       | CDKN2A   | 21967904         | 21968143       |
| hCDKN2A_Ex_2A    | chr9       | CDKN2A   | 21970969         | 21971233       |
| hCDKN2A_Ex_1b    | chr9       | CDKN2A   | 21974961         | 21975163       |
| hIDH2            | chr15      | IDH2     | 90088556         | 90088800       |
| hIRE_p.P915R     | chr17      | ERN1     | 64044131         | 64044366       |
| hIRE_R887C       | chr17      | ERN1     | 64044859         | 64045070       |
| hIRE_V826M       | chr17      | ERN1     | 64047849         | 64048076       |
| hIRE_Q780*/S769F | chr17      | ERN1     | 64048962         | 64049206       |
| hIRE_R627L       | chr17      | ERN1     | 64054268         | 64054480       |
| hIRE_A414T       | chr17      | ERN1     | 64057789         | 64058021       |
| hIRE_P380S       | chr17      | ERN1     | 64060466         | 64060700       |

|                 |       |      |          |          |
|-----------------|-------|------|----------|----------|
| hIRE_p.P336L    | chr17 | ERN1 | 64063890 | 64064124 |
| hIRE_p.V216=    | chr17 | ERN1 | 64066713 | 64066930 |
| hIRE_X95_splice | chr17 | ERN1 | 64075190 | 64075429 |
| hIRE_X59_splice | chr17 | ERN1 | 64097972 | 64098193 |



|       |      |                               |      |       |           |           |   |                   |     |   |   |   |        |          |             |                |
|-------|------|-------------------------------|------|-------|-----------|-----------|---|-------------------|-----|---|---|---|--------|----------|-------------|----------------|
| EGFR  | 1956 | Asenjo Neurosurgery Institute | hg38 | chr7  | 55154128  | 55154128  | + | Missense_Mutation | SNP | G | G | A | HGG_32 | p.A244T  | 0,94488189  | NM_001346897.1 |
| EGFR  | 1956 | Asenjo Neurosurgery Institute | hg38 | chr7  | 55154128  | 55154128  | + | Missense_Mutation | SNP | G | G | A | HGG_35 | p.A244T  | 0,194331984 | NM_001346897.1 |
| EGFR  | 1956 | Asenjo Neurosurgery Institute | hg38 | chr7  | 55154129  | 55154129  | + | Missense_Mutation | SNP | C | C | T | HGG_6  | p.A244V  | 0,909090909 | NM_001346897.1 |
| EGFR  | 1956 | Asenjo Neurosurgery Institute | hg38 | chr7  | 55154129  | 55154129  | + | Missense_Mutation | SNP | C | C | T | HGG_20 | p.A244V  | 0,403703704 | NM_001346897.1 |
| EGFR  | 1956 | Asenjo Neurosurgery Institute | hg38 | chr7  | 55154129  | 55154129  | + | Missense_Mutation | SNP | C | C | T | HGG_42 | p.A244V  | 0,090909091 | NM_001346897.1 |
| EGFR  | 1956 | Asenjo Neurosurgery Institute | hg38 | chr7  | 55154129  | 55154129  | + | Missense_Mutation | SNP | C | C | A | HGG_53 | p.A244D  | 0,175510204 | NM_001346897.1 |
| EGFR  | 1956 | Asenjo Neurosurgery Institute | hg38 | chr7  | 55154129  | 55154129  | + | Missense_Mutation | SNP | C | C | T | HGG_60 | p.A244V  | 0,751210068 | NM_001346897.1 |
| EGFR  | 1956 | Asenjo Neurosurgery Institute | hg38 | chr7  | 55154142  | 55154142  | + | Missense_Mutation | SNP | G | G | C | HGG_32 | p.K248N  | 0,94481982  | NM_001346897.1 |
| EGFR  | 1956 | Asenjo Neurosurgery Institute | hg38 | chr7  | 55155847  | 55155847  | + | Missense_Mutation | SNP | G | G | A | HGG_51 | p.D258N  | 0,82300885  | NM_001346897.1 |
| EGFR  | 1956 | Asenjo Neurosurgery Institute | hg38 | chr7  | 55156614  | 55156614  | + | Missense_Mutation | SNP | C | C | T | HGG_4  | p.T318I  | 0,395308427 | NM_001346897.1 |
| EGFR  | 1956 | Asenjo Neurosurgery Institute | hg38 | chr7  | 55160222  | 55160222  | + | Missense_Mutation | SNP | T | T | C | HGG_62 | p.V416A  | 0,379844961 | NM_001346897.1 |
| EGFR  | 1956 | Asenjo Neurosurgery Institute | hg38 | chr7  | 55165350  | 55165350  | + | Missense_Mutation | SNP | G | G | T | HGG_1  | p.G553V  | 0,807002562 | NM_001346897.1 |
| EGFR  | 1956 | Asenjo Neurosurgery Institute | hg38 | chr7  | 55165416  | 55165416  | + | Missense_Mutation | SNP | G | G | A | HGG_68 | p.C575Y  | 0,257425743 | NM_001346897.1 |
| EGFR  | 1956 | Asenjo Neurosurgery Institute | hg38 | chr7  | 55198792  | 55198792  | + | Missense_Mutation | SNP | T | T | C | HGG_3  | p.I881T  | 0,225806452 | NM_001346897.1 |
| EGFR  | 1956 | Asenjo Neurosurgery Institute | hg38 | chr7  | 55198792  | 55198792  | + | Missense_Mutation | SNP | T | T | C | HGG_5  | p.I881T  | 0,5         | NM_001346897.1 |
| ERN1  | 2081 | Asenjo Neurosurgery Institute | hg38 | chr17 | 64044182  | 64044182  | + | Missense_Mutation | SNP | G | G | T | HGG_22 | p.L914M  | 0,4579      | NM_001433.3    |
| ERN1  | 2081 | Asenjo Neurosurgery Institute | hg38 | chr17 | 64044182  | 64044182  | + | Missense_Mutation | SNP | G | G | T | HGG_23 | p.L914M  | 1           | NM_001433.3    |
| ERN1  | 2081 | Asenjo Neurosurgery Institute | hg38 | chr17 | 64044182  | 64044182  | + | Missense_Mutation | SNP | G | G | T | HGG_25 | p.L914M  | 0,4031      | NM_001433.3    |
| ERN1  | 2081 | Asenjo Neurosurgery Institute | hg38 | chr17 | 64044182  | 64044182  | + | Missense_Mutation | SNP | G | G | T | HGG_41 | p.L914M  | 0,0738      | NM_001433.3    |
| ERN1  | 2081 | Asenjo Neurosurgery Institute | hg38 | chr17 | 64044182  | 64044182  | + | Missense_Mutation | SNP | G | G | T | HGG_43 | p.L914M  | 0,5333      | NM_001433.3    |
| ERN1  | 2081 | Asenjo Neurosurgery Institute | hg38 | chr17 | 64044182  | 64044182  | + | Missense_Mutation | SNP | G | G | T | HGG_53 | p.L914M  | 0,1837      | NM_001433.3    |
| ERN1  | 2081 | Asenjo Neurosurgery Institute | hg38 | chr17 | 64044182  | 64044182  | + | Missense_Mutation | SNP | G | G | T | HGG_58 | p.L914M  | 0,496       | NM_001433.3    |
| ERN1  | 2081 | Asenjo Neurosurgery Institute | hg38 | chr17 | 64044182  | 64044182  | + | Missense_Mutation | SNP | G | G | T | HGG_70 | p.L914M  | 0,4465      | NM_001433.3    |
| ERN1  | 2081 | Asenjo Neurosurgery Institute | hg38 | chr17 | 64054341  | 64054341  | + | Missense_Mutation | SNP | T | T | C | HGG_55 | p.E621G  | 0,121212121 | NM_001433.3    |
| ERN1  | 2081 | Asenjo Neurosurgery Institute | hg38 | chr17 | 64054411  | 64054411  | + | Missense_Mutation | SNP | C | C | T | HGG_33 | p.V598M  | 0,053571429 | NM_001433.3    |
| ATRX  | 546  | Asenjo Neurosurgery Institute | hg38 | chrX  | 77599534  | 77599534  | + | Missense_Mutation | SNP | C | C | T | HGG_8  | p.G1945R | 0,076086957 | NM_000489.4    |
| ATRX  | 546  | Asenjo Neurosurgery Institute | hg38 | chrX  | 77682178  | 77682178  | + | Missense_Mutation | SNP | A | A | C | HGG_2  | p.C1026W | 0,120171674 | NM_000489.4    |
| ATRX  | 546  | Asenjo Neurosurgery Institute | hg38 | chrX  | 77682178  | 77682178  | + | Missense_Mutation | SNP | A | A | C | HGG_3  | p.C1026W | 0,060606061 | NM_000489.4    |
| ATRX  | 546  | Asenjo Neurosurgery Institute | hg38 | chrX  | 77682178  | 77682178  | + | Missense_Mutation | SNP | A | A | C | HGG_5  | p.C1026W | 0,104089219 | NM_000489.4    |
| ATRX  | 546  | Asenjo Neurosurgery Institute | hg38 | chrX  | 77682178  | 77682178  | + | Missense_Mutation | SNP | A | A | C | HGG_10 | p.C1026W | 0,101769912 | NM_000489.4    |
| ATRX  | 546  | Asenjo Neurosurgery Institute | hg38 | chrX  | 77684938  | 77684938  | + | Splice_Site       | SNP | C | C | T | HGG_55 | p.T      | 0,282828283 | NM_000489.4    |
| PTEN  | 5728 | Asenjo Neurosurgery Institute | hg38 | chr10 | 87864513  | 87864513  | + | Missense_Mutation | SNP | G | G | A | HGG_8  | p.R15K   | 0,73136646  | NM_001304717.2 |
| PTEN  | 5728 | Asenjo Neurosurgery Institute | hg38 | chr10 | 87894052  | 87894052  | + | Missense_Mutation | SNP | G | G | T | HGG_64 | p.G36V   | 0,3014862   | NM_001304717.2 |
| PTEN  | 5728 | Asenjo Neurosurgery Institute | hg38 | chr10 | 87925518  | 87925518  | + | Missense_Mutation | SNP | T | T | C | HGG_26 | p.L57S   | 0,361084221 | NM_001304717.2 |
| PTEN  | 5728 | Asenjo Neurosurgery Institute | hg38 | chr10 | 87925551  | 87925551  | + | Missense_Mutation | SNP | A | A | G | HGG_66 | p.Y68C   | 0,284848485 | NM_001304717.2 |
| PTEN  | 5728 | Asenjo Neurosurgery Institute | hg38 | chr10 | 87925553  | 87925553  | + | Missense_Mutation | SNP | A | A | G | HGG_22 | p.N69D   | 0,436781609 | NM_001304717.2 |
| PTEN  | 5728 | Asenjo Neurosurgery Institute | hg38 | chr10 | 87931089  | 87931089  | + | Splice_Site       | SNP | G | G | C | HGG_53 | p.V85L   | 0,116564417 | NM_001304717.2 |
| PTEN  | 5728 | Asenjo Neurosurgery Institute | hg38 | chr10 | 87933224  | 87933225  | + | Frame_Shift_Ins   | INS | - | - | - | HGG_27 | p.E157fs | 0,437238494 | NM_001304717.2 |
| PTEN  | 5728 | Asenjo Neurosurgery Institute | hg38 | chr10 | 87933253  | 87933253  | + | Splice_Site       | DEL | T | T | - | HGG_29 | -        | 0,173669468 | NM_001304717.2 |
| PTEN  | 5728 | Asenjo Neurosurgery Institute | hg38 | chr10 | 87952235  | 87952235  | + | Missense_Mutation | SNP | C | C | T | HGG_24 | p.P204S  | 0,623042506 | NM_001304717.2 |
| PTEN  | 5728 | Asenjo Neurosurgery Institute | hg38 | chr10 | 87957970  | 87957970  | + | Missense_Mutation | SNP | G | G | T | HGG_39 | p.G251V  | 0,343675418 | NM_001304717.2 |
| PTEN  | 5728 | Asenjo Neurosurgery Institute | hg38 | chr10 | 87957976  | 87957976  | + | Missense_Mutation | SNP | T | T | G | HGG_9  | p.I253S  | 0,088235294 | NM_001304717.2 |
| PTEN  | 5728 | Asenjo Neurosurgery Institute | hg38 | chr10 | 87957976  | 87957976  | + | Missense_Mutation | SNP | T | T | G | HGG_47 | p.I253S  | 0,860869565 | NM_001304717.2 |
| IDH1  | 3417 | Asenjo Neurosurgery Institute | hg38 | chr2  | 208248388 | 208248388 | + | Missense_Mutation | SNP | C | C | T | HGG_5  | p.R132H  | 0,452879581 | NM_001282387.1 |
| IDH1  | 3417 | Asenjo Neurosurgery Institute | hg38 | chr2  | 208248388 | 208248388 | + | Missense_Mutation | SNP | C | C | T | HGG_13 | p.R132H  | 0,378808549 | NM_001282387.1 |
| IDH1  | 3417 | Asenjo Neurosurgery Institute | hg38 | chr2  | 208248388 | 208248388 | + | Missense_Mutation | SNP | C | C | T | HGG_17 | p.R132H  | 0,406797116 | NM_001282387.1 |
| IDH1  | 3417 | Asenjo Neurosurgery Institute | hg38 | chr2  | 208248388 | 208248388 | + | Missense_Mutation | SNP | C | C | T | HGG_19 | p.R132H  | 0,406189555 | NM_001282387.1 |
| IDH1  | 3417 | Asenjo Neurosurgery Institute | hg38 | chr2  | 208248388 | 208248388 | + | Missense_Mutation | SNP | C | C | T | HGG_28 | p.R132H  | 0,434746467 | NM_001282387.1 |
| IDH1  | 3417 | Asenjo Neurosurgery Institute | hg38 | chr2  | 208248388 | 208248388 | + | Missense_Mutation | SNP | C | C | T | HGG_31 | p.R132H  | 0,359765833 | NM_001282387.1 |
| IDH1  | 3417 | Asenjo Neurosurgery Institute | hg38 | chr2  | 208248388 | 208248388 | + | Missense_Mutation | SNP | C | C | T | HGG_37 | p.R132H  | 0,400977995 | NM_001282387.1 |
| IDH1  | 3417 | Asenjo Neurosurgery Institute | hg38 | chr2  | 208248388 | 208248388 | + | Missense_Mutation | SNP | C | C | T | HGG_50 | p.R132H  | 0,444116199 | NM_001282387.1 |
| IDH1  | 3417 | Asenjo Neurosurgery Institute | hg38 | chr2  | 208248389 | 208248389 | + | Missense_Mutation | SNP | G | G | T | HGG_3  | p.R132S  | 0,363953488 | NM_001282387.1 |
| H3-3A |      | Asenjo Neurosurgery Institute | hg38 | chr1  | 226064434 | 226064434 | + | Missense_Mutation | SNP | A | A | T | HGG_55 | p.K28M   | 0,422413793 | NM_002107.4    |
